# Supplementary material for: In vitro and in silico studies on α-glucosidase inhibitory properties of bioactive components from the rhizomes of Alpinia officinarum Hance
Source: Research Square preprint supplement (doi:10.21203/rs.3.rs-5045050/v1), 2024-10-21
Supplement: Supplementary file 1 [file 8e9b1a742c66d734cc115c31.docx]

**Supplementary materials**

***In vitro* and *in silico* studies on *α*-glucosidase inhibitory properties of bioactive components from the rhizomes of *Alpinia officinarum* Hance**

Zakhele Mphatsi Dlamini 1 ∙ Bongani Sicelo Dlamini 1 ∙ Shih-Han Fu 2 ∙ Ya-Lin Chang2 ∙ Chi-Chien Lin 3 ∙ Yu-Kuo Chen 4 ∙ Kok-Tong Tan 5,6 ∙ Chi-I Chang 2,7

1Department of Tropical Agriculture and International Cooperation, National Pingtung University of Science and Technology, Pingtung 912301, Taiwan

2 Department of Biological Science and Technology, National Pingtung University of Science and Technology, Pingtung 912301, Taiwan

3 Institute of Biomedical Science, The iEGG and Animal Biotechnology Center, National Chung-Hsing University, Taichung 402202, Taiwan

4 Department of Food Science, National Pingtung University of Science and Technology, Pingtung 912301, Taiwan

5 Department of Surgery, Tungs’ Taichung Metro Harbor Hospital, Taichung 435403, Taiwan

6 College of Medicine, National Chung Hsing University, Taichung 402202, Taiwan

7 Traditional Herbal Medicine Research Center, Taipei Medical University Hospital, Taipei 110301, Taiwan

Corresponding author(s):

🖂Chi-I Chang

changchii@mail.npust.edu.tw

🖂 Kok-Tong Tan

t1840@ms.sltung.com.tw

**Table of Contents**

Fig. S1 1H-NMR spectrum for compound **1** in acetone-*d6*

Fig. S2 13C-NMR spectrum and DEPT for compound **1** in acetone-*d6*

Fig. S3 Mass spectrum of compound **1**

Fig. S4 1H-NMR spectrum for compound **2** in acetone-*d6*

Fig. S5 13C-NMR spectrum and DEPT for compound **2** in acetone-*d6*

Fig. S6 Mass spectrum of compound **2**

Fig. S7 1H-NMR spectrum for compound **3** in CDCl3

Fig. S8 13C-NMR spectrum and DEPT for compound **3** in CDCl3

Fig. S9 Mass spectrum of compound **3**

Fig. S10 1H-NMR spectrum for compound **4** in CDCl3

Fig. S11 13C-NMR spectrum and DEPT for compound **4** in CDCl3

Fig. S12 Mass spectrum of compound **4**

Fig. S13 1H-NMR spectrum for compound **5** in CDCl3

Fig. S14 13C-NMR spectrum and DEPT for compound **5** in CDCl3

Fig. S15 Mass spectrum of compound **5**

**
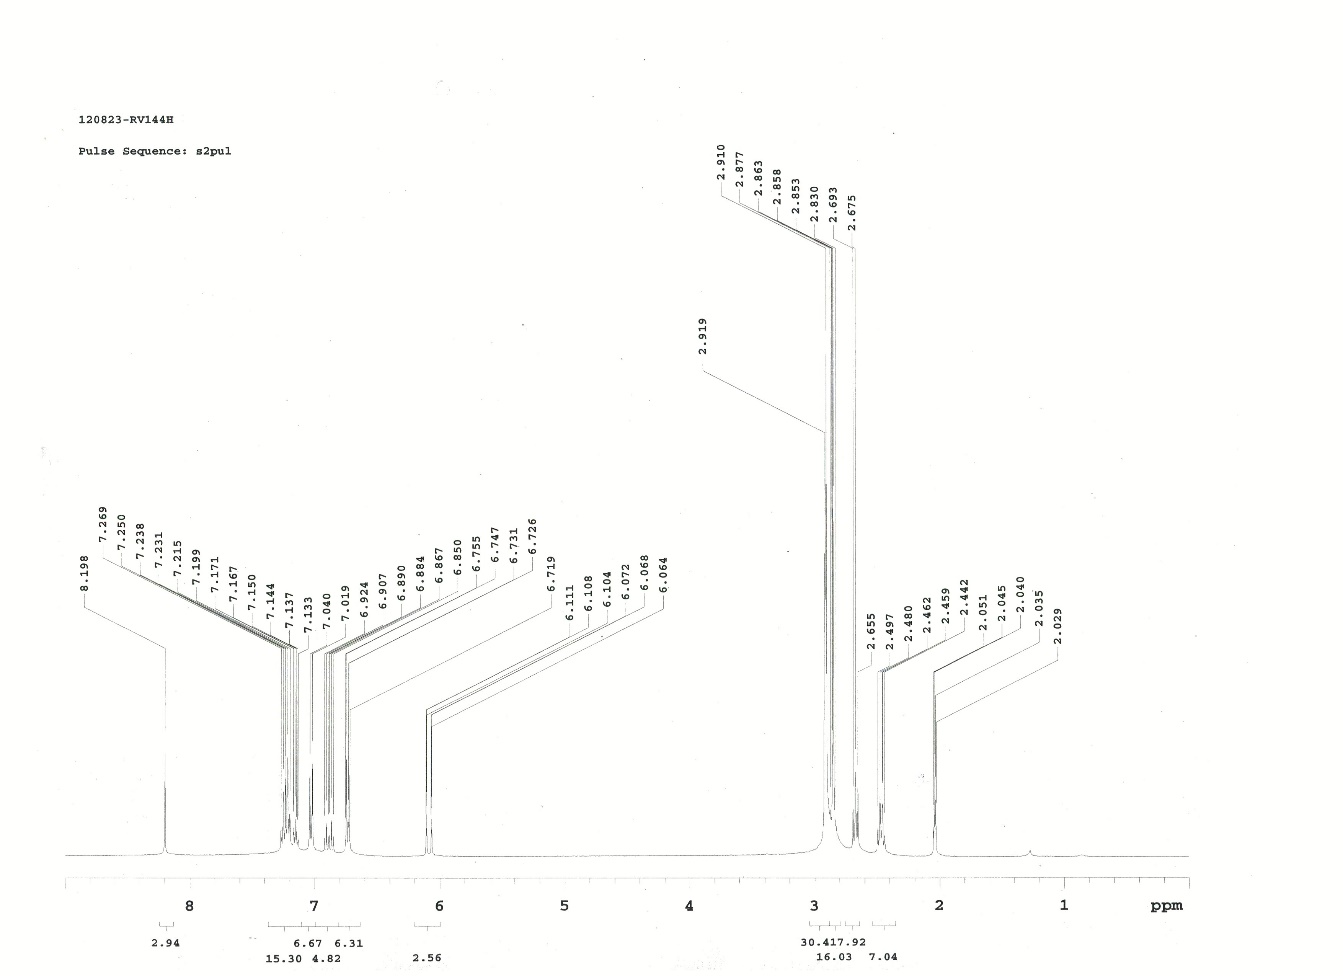
**

**Fig. S1** 1H-NMR spectrum for compound **1** in acetone-*d6*


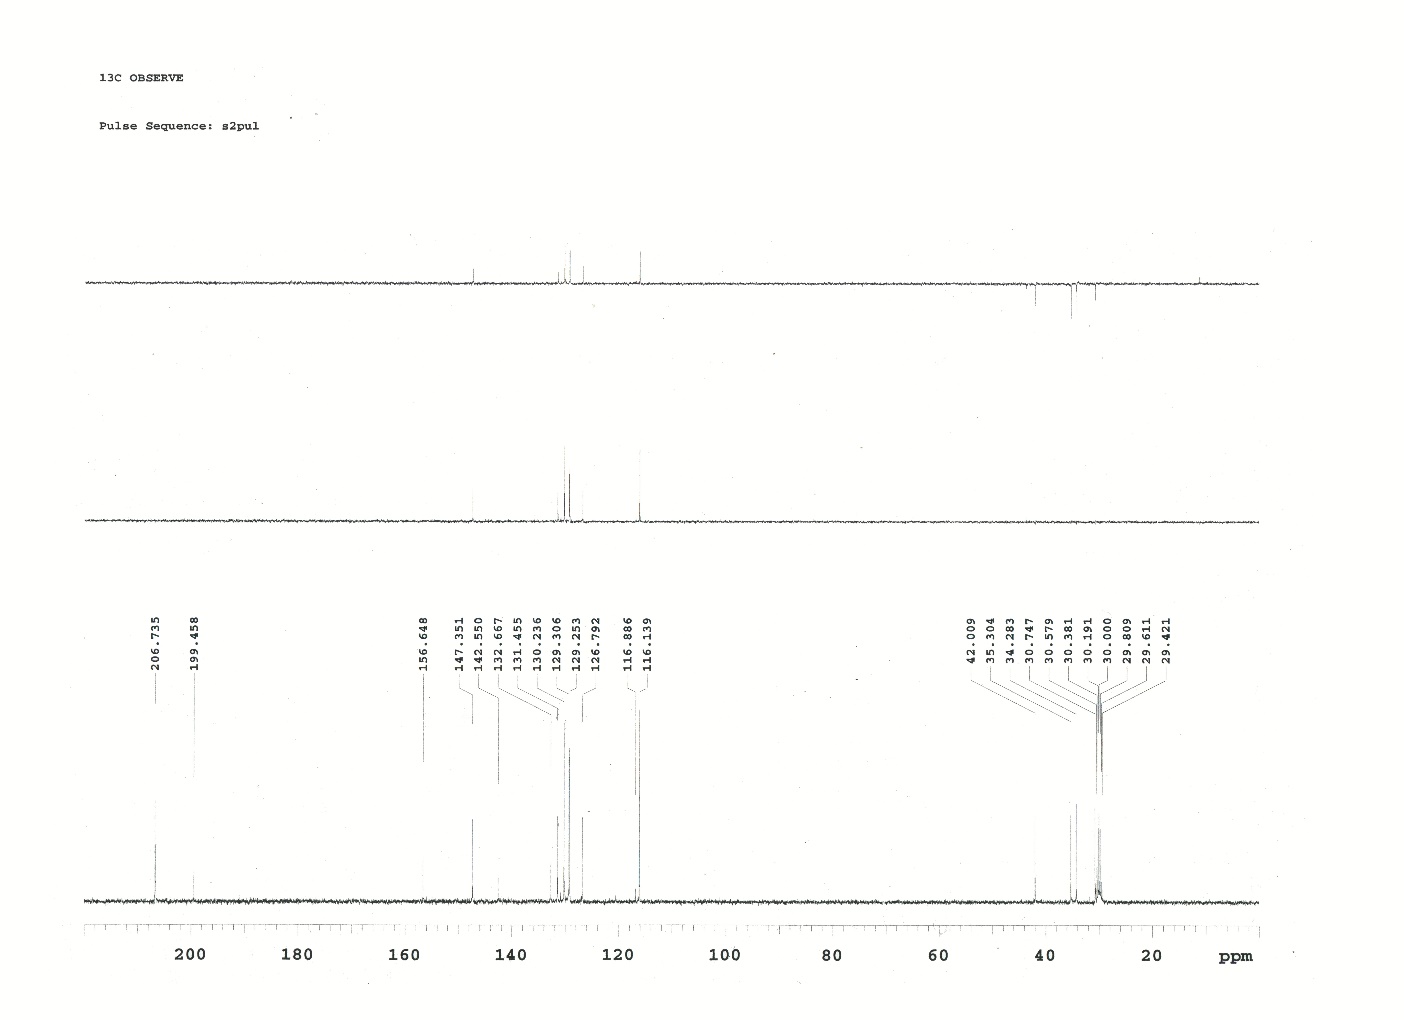


**Fig. S2** 13C-NMR spectrum and DEPT for compound **1** in acetone-*d6*

**
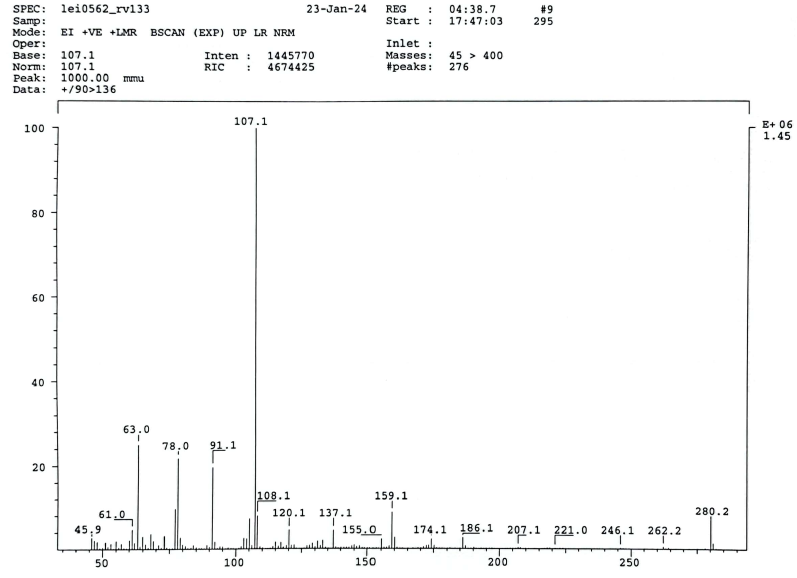
**

**Fig. S3** Mass spectrum of compound **1**

**
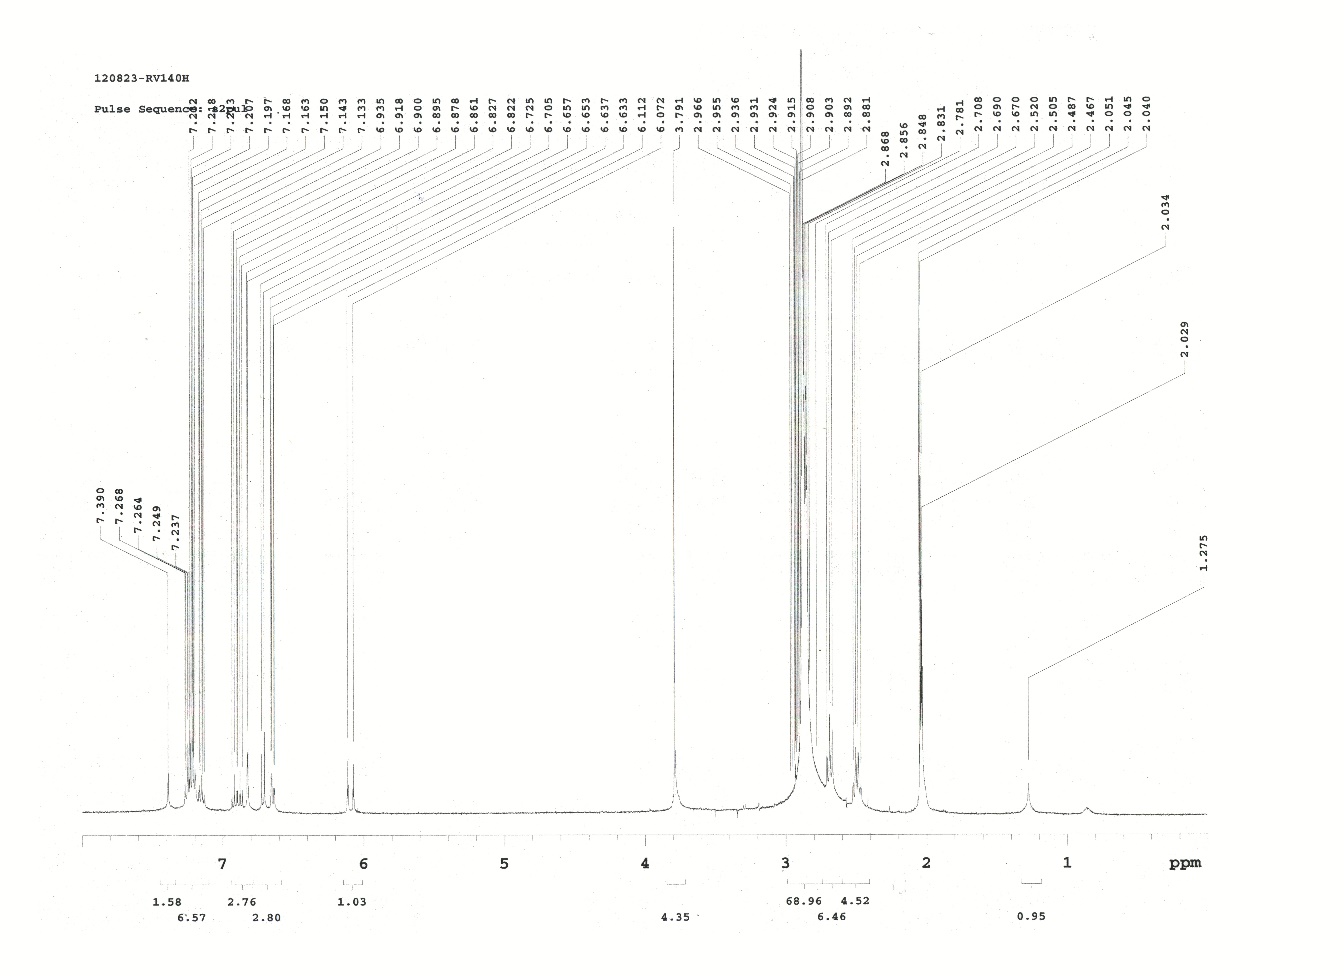
**

**Fig. S4** 1H-NMR spectrum of compound **2** in acetone-*d6*

**
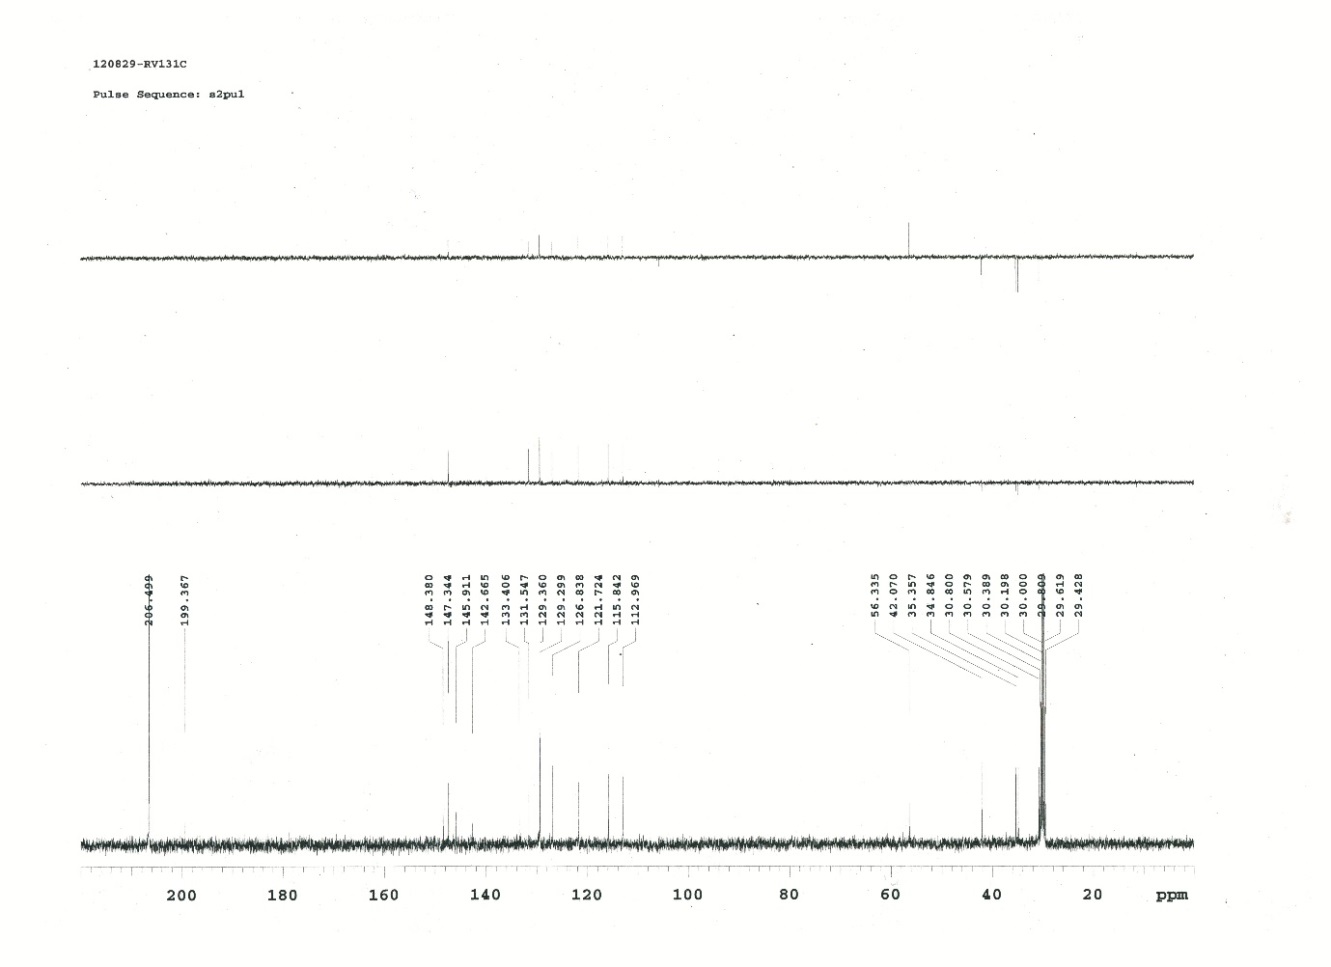
**

**Fig. S5** 13C-NMR spectrum and DEPT of compound **2** in acetone-*d6*


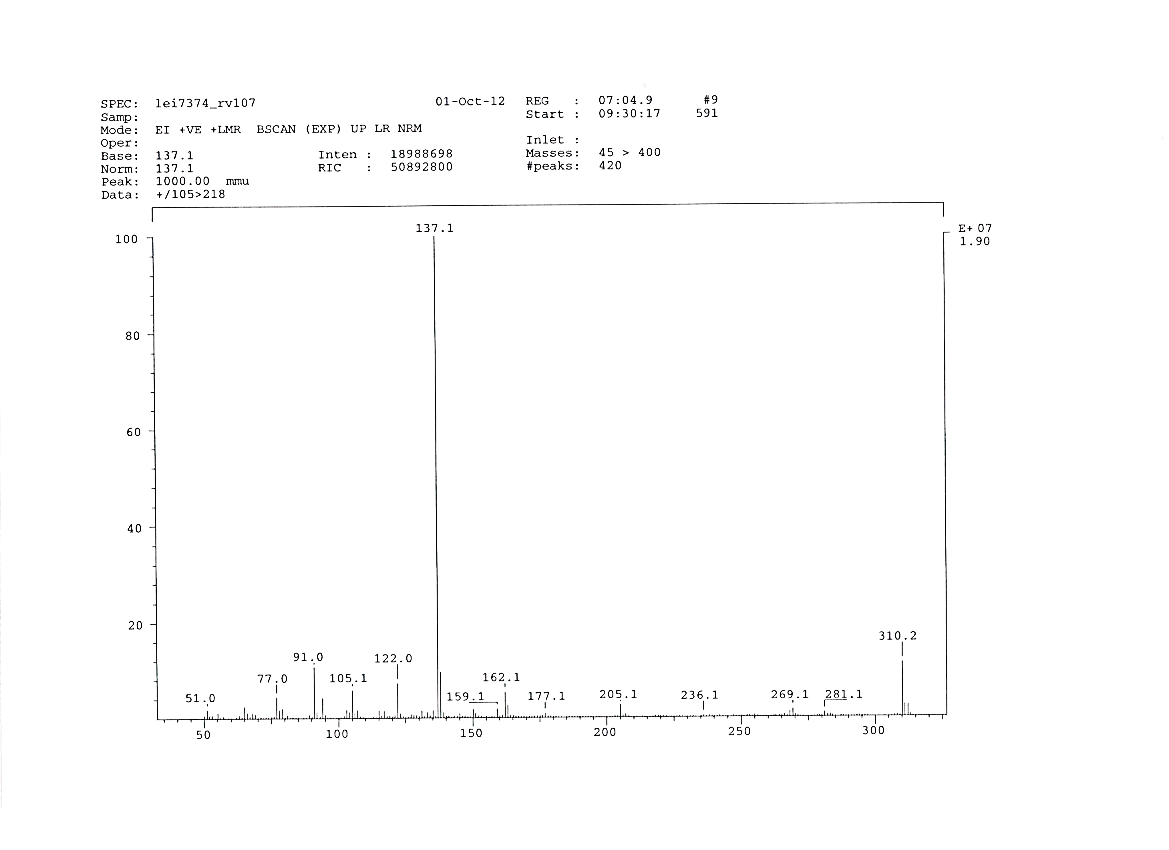


**Fig. S6** Mass spectrum of compound **2**

**
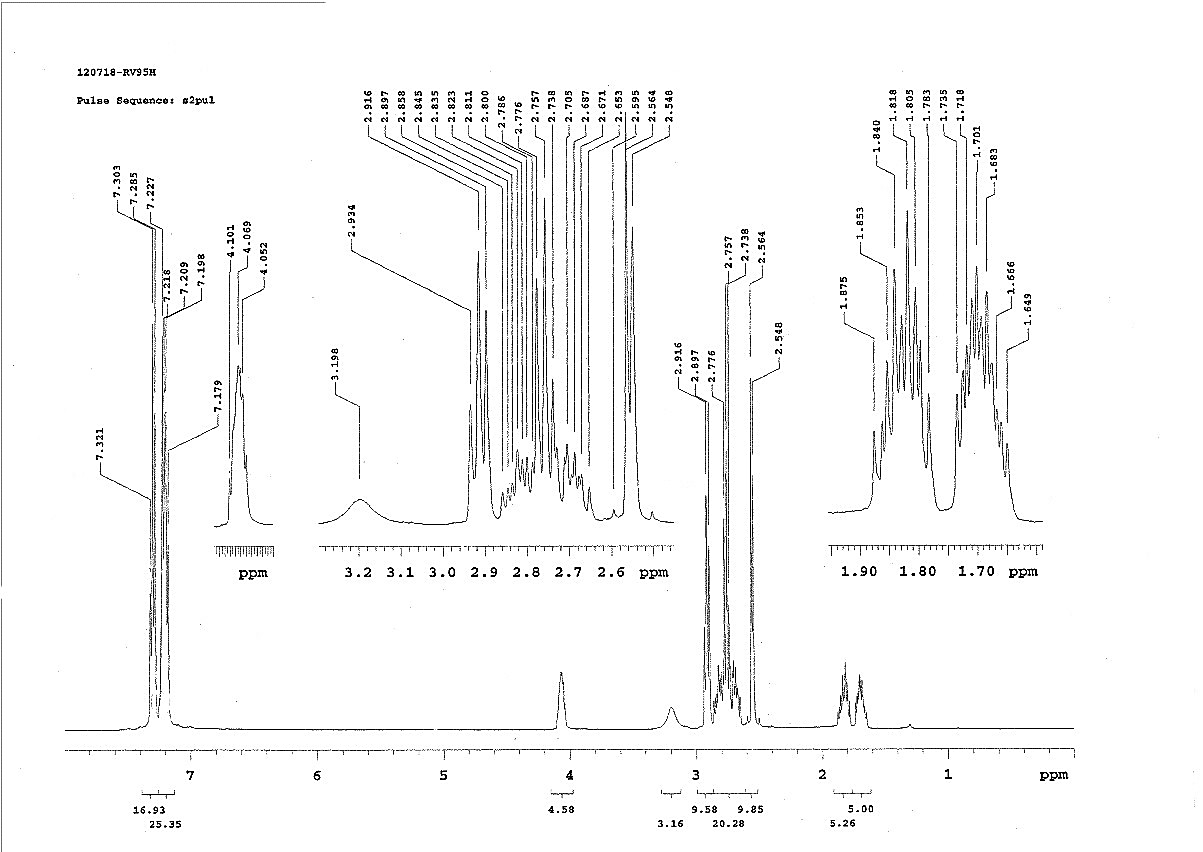
**

**Fig. S7** 1H-NMR spectrum of compound **3** in CDCl3


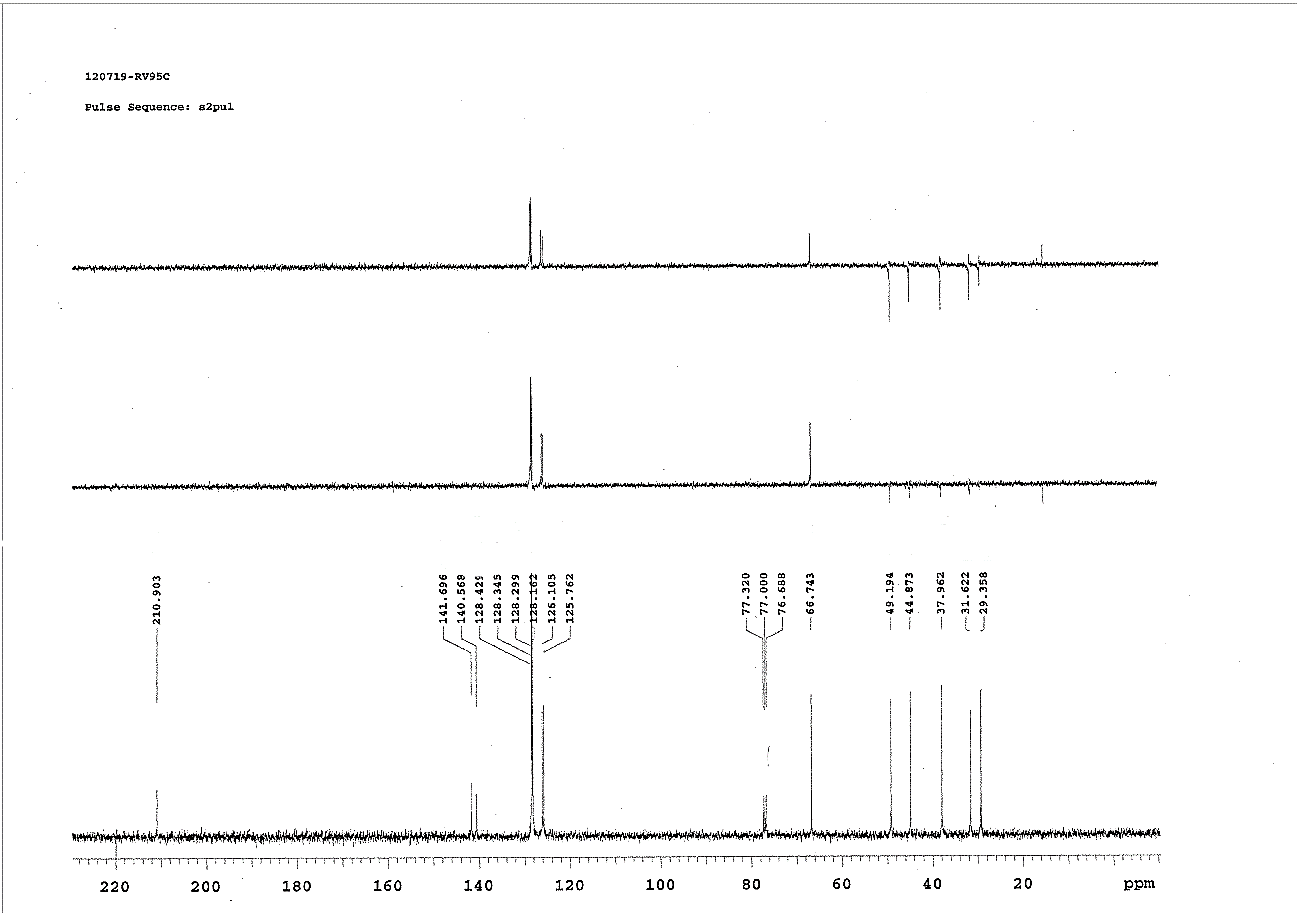


**Fig. S8** 13C-NMR spectrum and DEPT of compound **3** in CDCl3


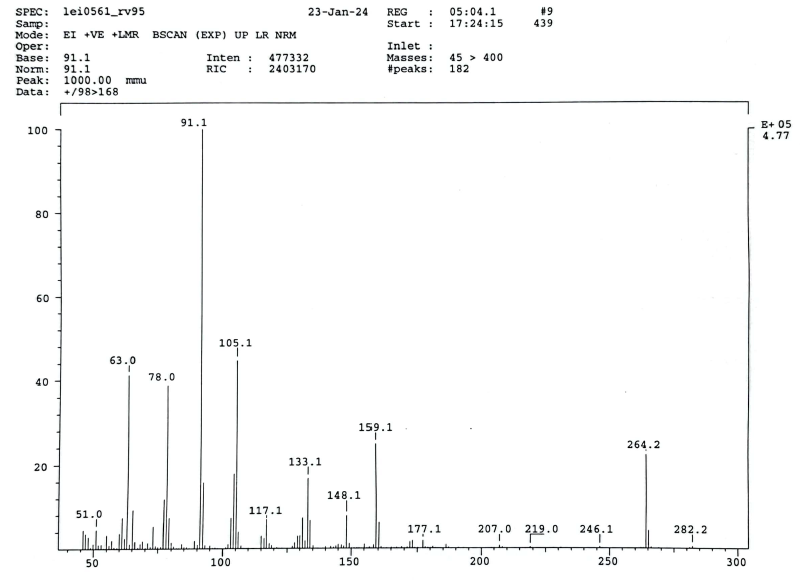


**Fig. S9** Mass spectrum of compound **3**

**
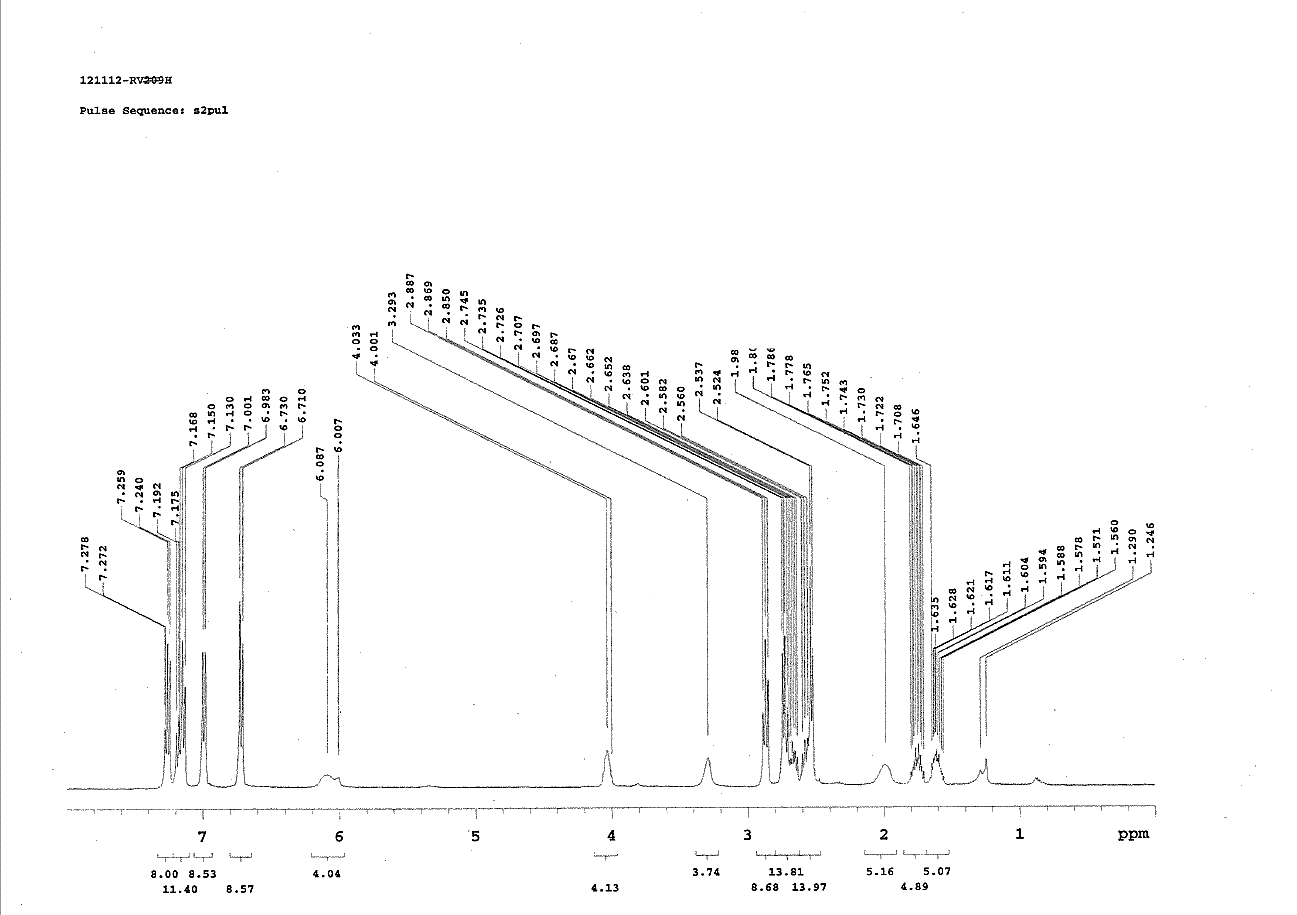
**

**Fig. S10** 1H-NMR spectrum for compound **4** in CDCl3


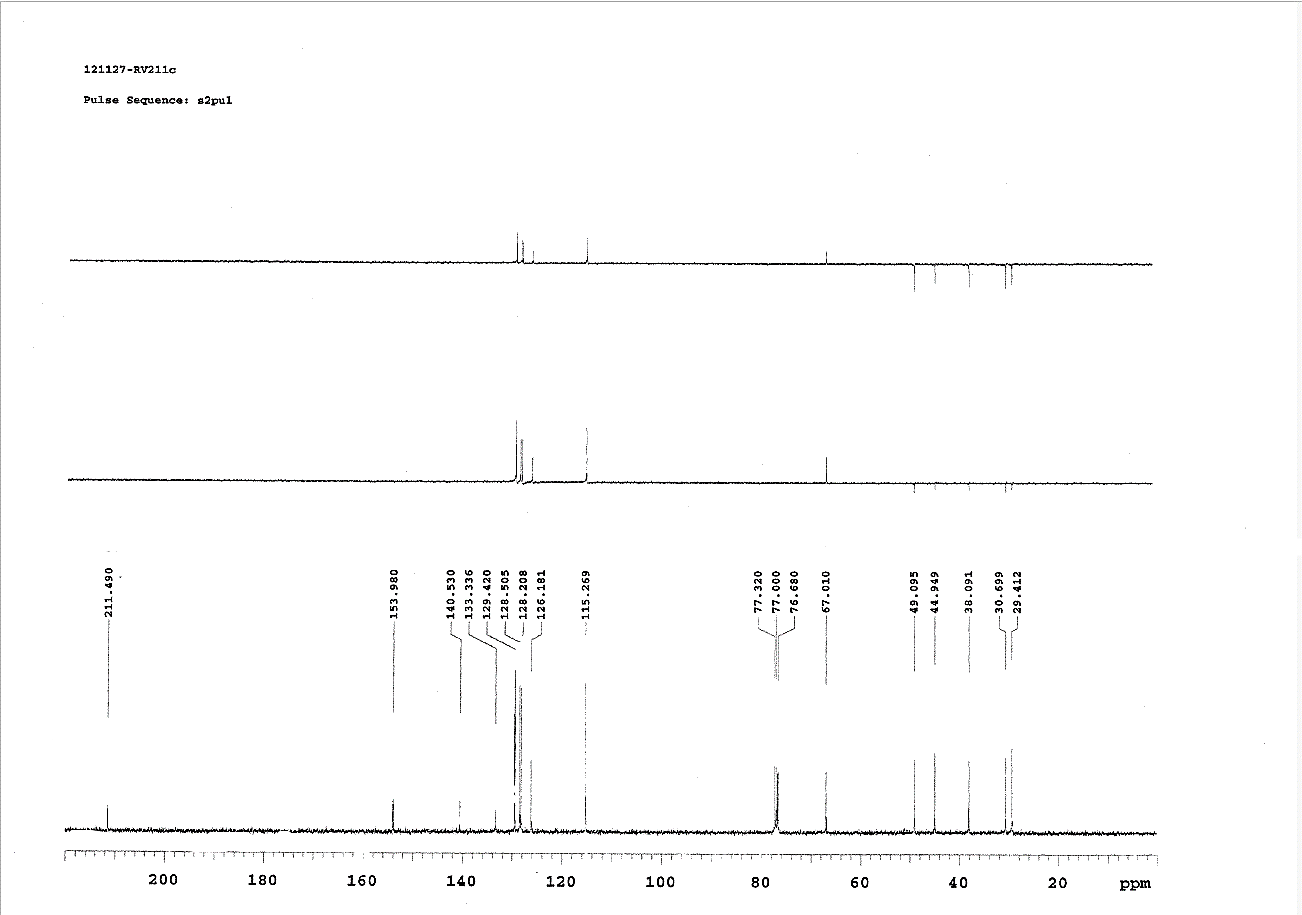


**Fig. S11** 13C-NMR spectra and DEPT for compound **4** in CDCl3


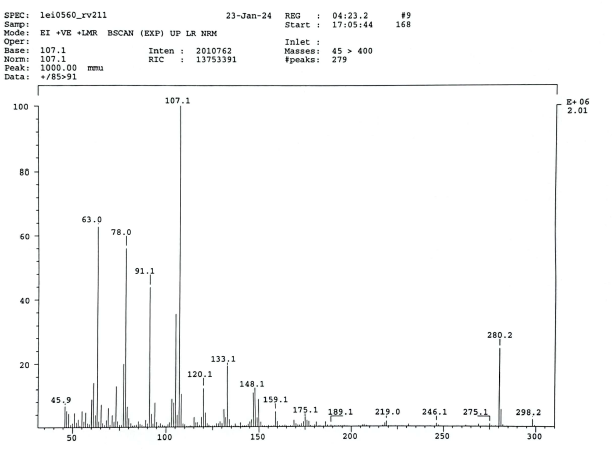


**Fig. S12** Mass spectrum of compound **4**


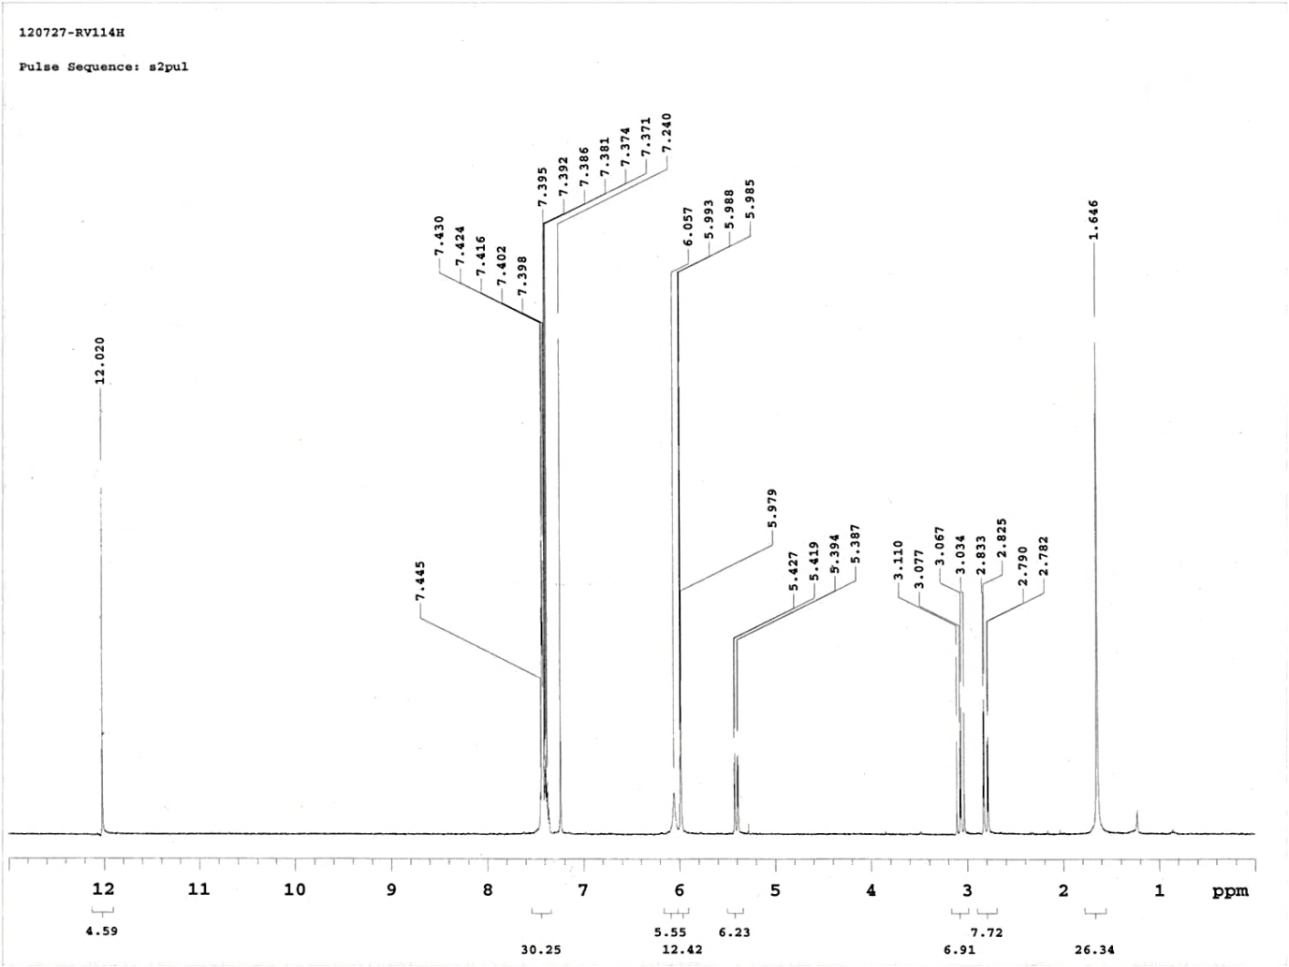


**Fig. S13** 1H-NMR spectrum for compound **5** in CDCl3


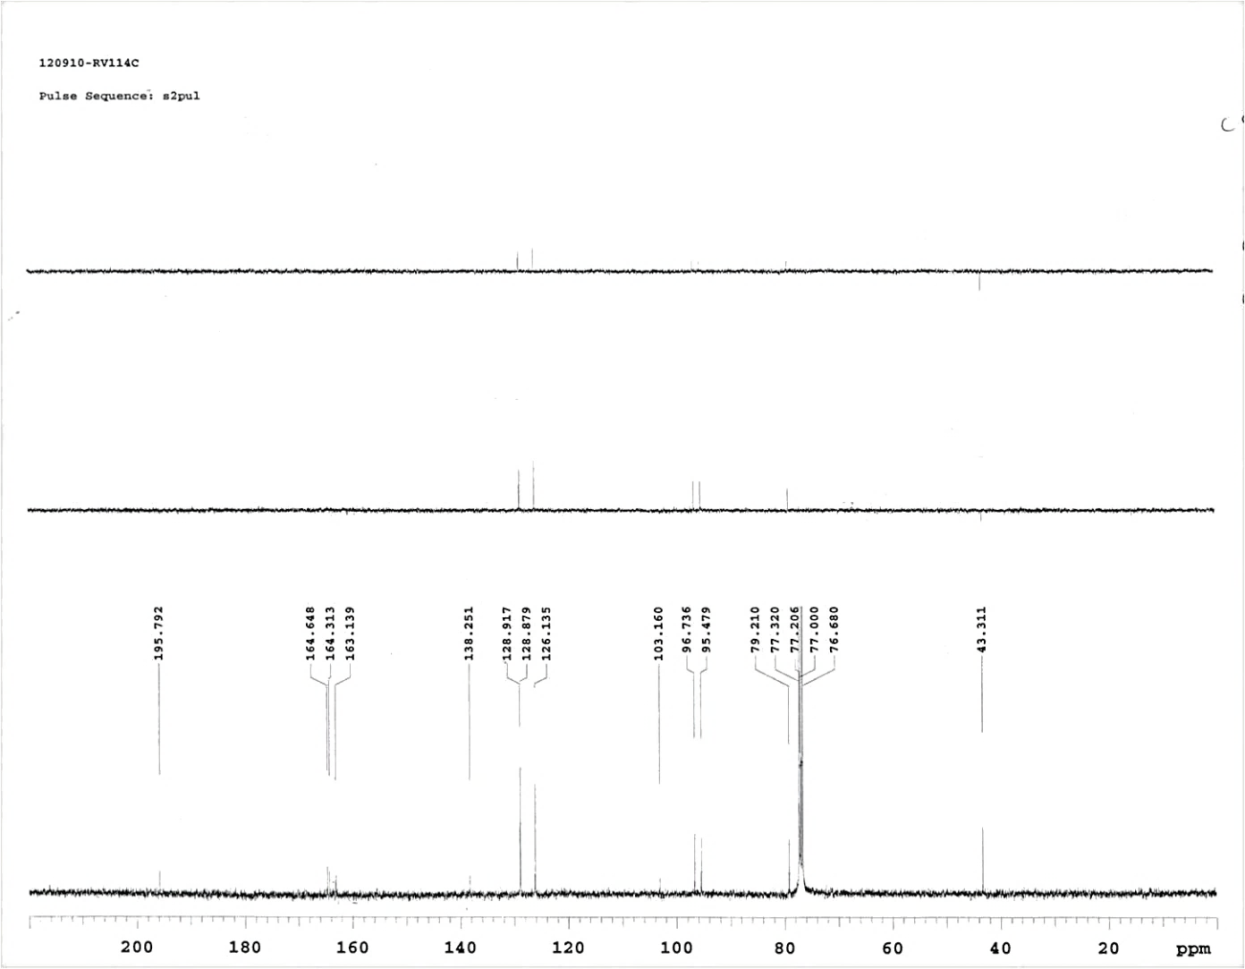


**Fig. S14** 13C-NMR spectrum and DEPT for compound **5** in CDCl3


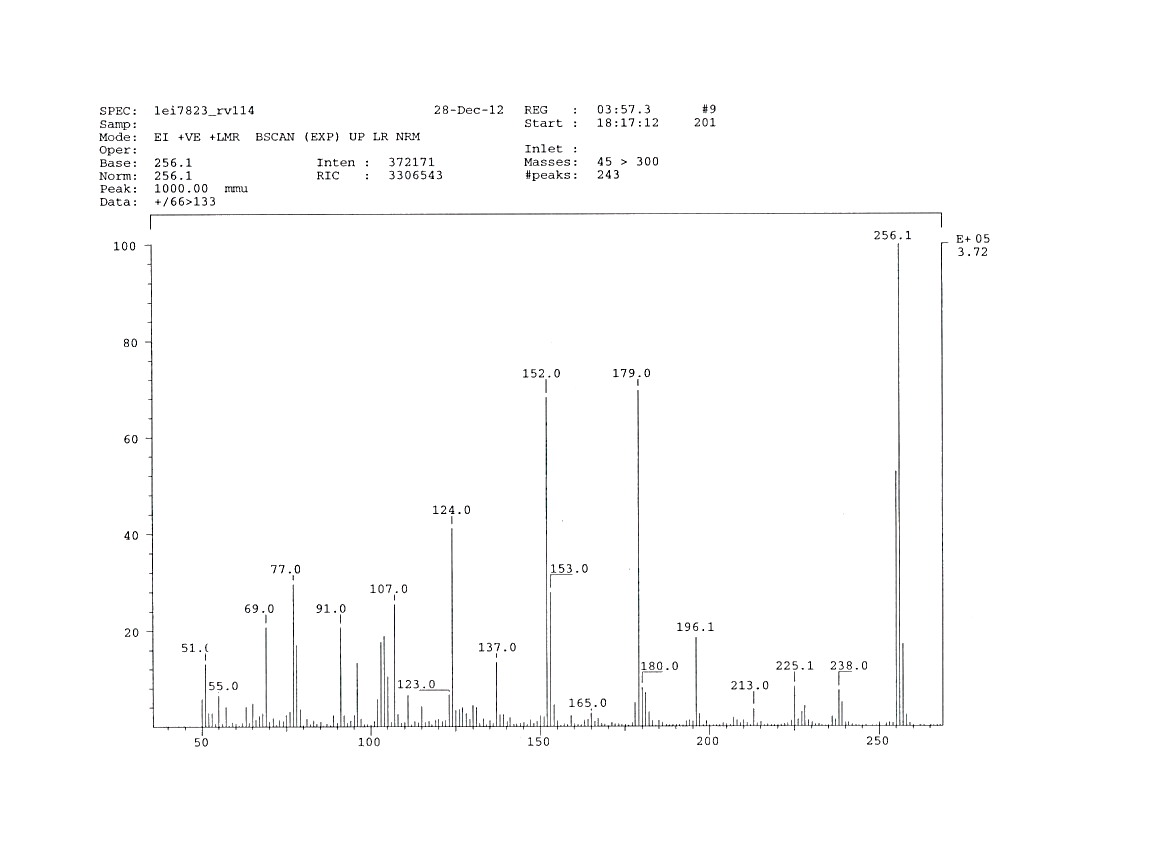


**Fig. S15** Mass spectrum of compound **5**
